# Supplementary material for: Different exposure metrics of rotating night shift work and hyperhomocysteinaemia among Chinese steelworkers: a cross-sectional study
Source: HighWire-hosted journal article supplement (doi:10.1136/bmjopen-2020-041576), 2020-12-01
Supplement: bmjopen-2020-041576supp001_data_supplement.pdf [file bmjopen-2020-041576supp001_data_supplement.pdf]

1 ***Supplementary files***

2 **Different exposure metrics of rotating night shift work and**  
3 **hyperhomocysteinemia among Chinese steelworkers: a cross-**  
4 **sectional study**

5 Shengkui Zhang,<sup>1</sup> Yongbin Wang,<sup>2</sup> Qinglin Li,<sup>1</sup> Zhende Wang,<sup>1</sup> Han Wang,<sup>1</sup> Chao Xue,<sup>1</sup> Ying Zhu,<sup>1</sup>  
6 Weijun Guan,<sup>1</sup> Juxiang Yuan<sup>1</sup>

7 1 Department of Epidemiology and Health Statistics, School of Public Health, North China  
8 University of Science and Technology, Tangshan, Hebei Province, China

9 2 Department of Epidemiology and Health Statistics, School of Public Health, Xinxiang  
10 Medical University, Xinxiang, Henan Province, China

11 Correspondence to  
12 Professor Juxiang Yuan;  
13 yuanjx@ncst.edu.cn

14 ***Assessment of covariates***

15 Smoking and drinking status were divided into “never”, “ever” and “current”. Dietary patterns were  
16 assessed based on the DASH diet score.<sup>1</sup> The level of education was divided into three categories:  
17 “primary or illiterate,” “middle or high school,” and “university or college.” The calculation of  
18 metabolic equivalents was based on the International Physical Activity Questionnaire (IPAQ).<sup>2</sup> The  
19 sleep quality assessment was estimated using the Athens Insomnia Scale (AIS).<sup>3</sup> Sedentary  
20 behaviour (hours/day) was assessed using a set of open-ended questions on the average working  
21 days and rest days time spent over the last four weeks on: television viewing (including DVDs and  
22 videos) and any other sitting during leisure time (including reading, studying, using a computer, and  
23 playing video games).<sup>4</sup> The durations of sleep and sedentary behaviour were the weighted averages  
24 of sleep and sedentary behaviour on working days and rest days, respectively.

25 Standard study protocols were used to train qualified physicians and nurses prior to this survey.  
26 Height and weight were measured three times each. The participants stood upright and barefoot in  
27 light clothes. The height and weight data that were ultimately used for analysis were accurate to 0.1

28 cm and 0.1 kg. Body mass index (BMI) was defined as body weight (kg) divided by the square of  
29 the body height ( $m^2$ ). Blood pressure measurements were performed three times at five-minute  
30 intervals using an electronic sphygmomanometer (OMRON, HBP-1100, China), and the  
31 participants were required to rest for more than ten minutes. Finally, the mean was obtained for  
32 analysis. Elevated blood pressure was defined as current systolic blood pressure  $\geq 140$  mmHg,  
33 diastolic blood pressure  $\geq 90$  mmHg, or if the patient was receiving antihypertensive therapy.  
34 Participants were required to fast overnight before the abdominal ultrasound examination and blood  
35 collection. Participants' anterior elbow vein blood was collected and centrifuged at room  
36 temperature (3000 r/min, 15 minutes) immediately. All blood samples were tested in the central  
37 laboratory of Tangshan Hongci Hospital Laboratory using automatic biochemical analysers  
38 (mindray, BS-800, China) within four hours. Total cholesterol (TC)  $\geq 6.22$  mmol/L, low-density  
39 lipoprotein (LDL-C)  $\geq 4.11$  mmol/L, or high-density lipoprotein (HDL-C)  $\leq 1.04$  mmol/L or  
40 triglycerides (TG)  $\geq 2.32$  mmol/L, or patients undergoing lipid-lowering therapy were considered to  
41 demonstrate dyslipidaemia.<sup>5</sup> Alanine aminotransferase (ALT)  $> 40$  U/L, aspartate aminotransferase  
42 (AST)  $> 40$  U/L or glutamyl transpeptidase ( $\gamma$ -GT)  $> 58$  U/L was defined as abnormal liver enzymes.  
43 Diabetes was defined as fasting blood glucose  $\geq 7.0$  mmol/L or if the patient was receiving  
44 hypoglycaemic therapy. Assessment of estimated glomerular filtration rate (eGFR) was based on  
45 the Chronic Kidney Disease Epidemiology Collaboration (CKD-EPI) equation.<sup>6</sup> The CKD-EPI  
46 formula is as follows:  $eGFR (mL/min/1.73 m^2) = 141 \times \min(Scr/\kappa, 1)^\alpha \times \max(Scr/\kappa, 1)^{-1.209} \times$   
47  $0.993^{Age} \times (1.018 \text{ if female}) \times (1.159 \text{ if black})$ . Scr indicates serum creatinine ( $\mu\text{mol/L}$ ),  $\kappa = 0.7$  for  
48 females and 0.9 for males,  $\alpha = -0.329$  for females and  $-0.411$  for males, min and max indicate the  
49 minimum of  $Scr/\kappa$  or 1, the maximum of  $Scr/\kappa$  or 1, respectively. According to the Kidney Disease  
50 Improving Global Outcomes 2012 recommendations, the range of GFR ( $mL/min/1.73 m^2$ ) was  
51 classed into five categories: normal or high (GFR  $\geq 90$ , G1), mildly decreased (GFR: 60–89, G2),  
52 mildly to moderately decreased (GFR: 45–59, G3a), moderately to severely decreased (GFR: 30–  
53 44, G3b), severely decreased (GFR: 15–29, G4), and kidney failure (GFR  $< 15$ , G5).<sup>7</sup> Based on these  
54 classification criteria, only 22 (0.3%) participants had  $eGFR < 60 mL/min/1.73 m^2$  (G3a–G5), so we  
55 combined these categories into G2 in the subsequent analysis and defined them as “decreased eGFR”  
56 ( $< 90 mL/min/1.73 m^2$ ).

57 Exposure to dust was defined as workers who may be exposed to productive dust (inorganic

58 dust, organic dust or mixed dust) during production (GBZ/T 229.1–2010).<sup>8</sup> The total dust in the air  
59 of the workplace was collected at the breathing zone with a filter membrane, and its concentration  
60 was calculated based on the increased weight of the filter membrane and the amount of gas collected.  
61 When the dust concentration in the air was  $\leq 50$  mg/m<sup>3</sup>, a filter membrane with a diameter of 37 mm  
62 or 40 mm was used; otherwise, a filter membrane with a diameter of 75 mm was used (GBZ/T  
63 192.1–2007).<sup>9</sup> Exposure to heat stress work was defined as the average wet-bulb globe temperature  
64 (WBGT) index of the workplace being equal to or greater than 25°C in the process of production  
65 (GBZ 2.2–2007).<sup>10</sup> The WBGT index was measured by a black-wet bulb globe thermometer. If there  
66 was no productive heat source in the workplace, three measuring points were selected to take the  
67 average value of the WBGT index; if where there was a productive heat source, 3 to 5 measuring  
68 points were selected to take the average value of the WBGT index. If the workplace was isolated  
69 into different thermal or ventilated environments, 2 measuring points were selected to take the  
70 average value of the WBGT index (GBZ/T 189.7–2007).<sup>11</sup> Exposure to industrial toxicants was  
71 defined as workers who may be exposed to a variety of harmful chemicals (the toxicant specifically  
72 refers to carbon monoxide in this population) during production (GBZ/T 229.2–2010).<sup>12</sup> Carbon  
73 monoxide or carbon dioxide in the air of the workplace was pumped into a non-dispersive infrared-  
74 ray (NDIR) analyzer and selectively absorbed its infrared rays. The concentration of carbon  
75 monoxide was determined according to the absorption value (GBZ/T 160.28–2004).<sup>13</sup> Exposure to  
76 noise was defined as workers who were exposed to a noisy environment where the 8-h/d or 40-  
77 h/week equivalent A-weighted sound pressure level was  $\geq 80$  dB, which may be harmful to health  
78 and hearing (GBZ/T 229.4–2012).<sup>14</sup> The workplace production noise was measured by a sound level  
79 meter. If the distribution of the sound field in the workplace was uniform (between-field difference  
80 of A-sound levels were less than 3 dB(A)), three measuring points were selected to take the average  
81 value; otherwise, the workplace was divided into several sound level areas. In each sound field, two  
82 measuring points were selected to take the average value (GBZ/T 189.8–2007).<sup>15</sup>

### 83 **Table of contents**

84 **Table S1** Basic characteristics of participants according to sex

85 **Table S2** Basic characteristics of participants according to duration of night shifts

- 86 **Table S3** Distribution of plasma total homocysteine levels according to age group
- 87 **Table S4** Independent effects of different exposure metrics of night shift work on HHcy among  
88 night shift workers (ever or current)
- 89 **Table S5** Interaction between duration and average frequency of night shifts on odds of HHcy
- 90 **Table S6** Multivariate-adjusted ORs between HHcy and different exposure metrics of night shift  
91 work according to sex
- 92 **Table S7** Multivariate-adjusted ORs between HHcy and different exposure metrics of night shift  
93 work after further adjusted for the main occupational hazards
- 94 **Figure legends**
- 95 **Figure S1** Associations of different exposure metrics of night shift work with HHcy odds.
- 96 **Figure S2** Prevalence of HHcy according to different exposure metrics of night shift work.
- 97 **Figure S3** Associations of duration, cumulative number and cumulative length of night shifts with  
98 tHcy (as a continuous or a binary variable) from restricted cubic spline models after deleting the last  
99 1% quantile of the duration of night shifts, cumulative number of night shifts and cumulative length  
100 of night shifts.

101

102 **Table S1** Basic characteristics of participants according to sex

| Variables                                         | Total<br>N=6846 | Sex             |                | P value |
|---------------------------------------------------|-----------------|-----------------|----------------|---------|
|                                                   |                 | Female<br>n=585 | Male<br>n=6261 |         |
| Current shift status, n (%)                       |                 |                 |                | <0.001  |
| Never                                             | 1027 (15.0)     | 118 (20.2)      | 909 (14.5)     |         |
| Ever                                              | 1493 (21.8)     | 140 (23.9)      | 1353 (21.6)    |         |
| Current                                           | 4326 (63.2)     | 327 (55.9)      | 3999 (63.9)    |         |
| Duration of night shifts (years), n (%)           |                 |                 |                | <0.001  |
| Never                                             | 1027 (15.0)     | 118 (20.2)      | 909 (14.5)     |         |
| Q1 (1–12)                                         | 1467 (21.4)     | 122 (20.9)      | 1345 (21.5)    |         |
| Q2 (13–20)                                        | 1491 (21.8)     | 130 (22.2)      | 1361 (21.7)    |         |
| Q3 (21–27)                                        | 1308 (19.1)     | 129 (22.1)      | 1179 (18.8)    |         |
| Q4 (28–43)                                        | 1553 (22.7)     | 86 (14.7)       | 1467 (23.4)    |         |
| Cumulative number of night shifts (nights), n (%) |                 |                 |                | <0.001  |
| Never                                             | 1027 (15.0)     | 118 (20.2)      | 909 (14.5)     |         |
| Q1 (43–1131)                                      | 1455 (21.3)     | 117 (20.0)      | 1338 (21.4)    |         |
| Q2 (1132–1848)                                    | 1455 (21.3)     | 131 (22.4)      | 1324 (21.2)    |         |
| Q3 (1854–2584)                                    | 1456 (21.3)     | 139 (23.8)      | 1317 (21.0)    |         |
| Q4 (2585–5239)                                    | 1453 (21.2)     | 80 (13.7)       | 1373 (21.9)    |         |
| Cumulative length of night shifts (hours), n (%)  |                 |                 |                | <0.001  |
| Never                                             | 1027 (15.0)     | 118 (20.2)      | 909 (14.5)     |         |
| Q1 (344–9488)                                     | 1452 (21.2)     | 118 (20.2)      | 1334 (21.3)    |         |
| Q2 (9490–15259)                                   | 1458 (21.3)     | 131 (22.4)      | 1327 (21.2)    |         |
| Q3 (15265–21293)                                  | 1456 (21.3)     | 134 (22.9)      | 1322 (21.1)    |         |
| Q4 (21295–53541)                                  | 1453 (21.2)     | 84 (14.4)       | 1369 (21.9)    |         |
| Average frequency of night shifts, n (%)          |                 |                 |                | <0.001  |
| Never                                             | 1027 (15.0)     | 118 (20.2)      | 909 (14.5)     |         |
| <3 nights/month                                   | 1576 (23.0)     | 152 (26.0)      | 1424 (22.7)    |         |
| 3–7 nights/month                                  | 901 (13.2)      | 78 (13.3)       | 823 (13.1)     |         |
| >7 nights/month                                   | 3342 (48.8)     | 237 (40.5)      | 3105 (49.6)    |         |
| Average length of night shifts, n (%)             |                 |                 |                | 0.002   |
| Never                                             | 1027 (15.0)     | 118 (20.2)      | 909 (14.5)     |         |
| ≤8 hours/night                                    | 4442 (64.9)     | 365 (62.4)      | 4077 (65.1)    |         |
| 8–9 hours/night                                   | 810 (11.8)      | 57 (9.7)        | 753 (12.0)     |         |
| >9 hours/night                                    | 567 (8.3)       | 45 (7.7)        | 522 (8.3)      |         |
| Percentage of hours on night shifts, n (%)        |                 |                 |                | <0.001  |
| Never                                             | 1027 (15.0)     | 118 (20.2)      | 909 (14.5)     |         |
| <20%                                              | 819 (12.0)      | 86 (14.7)       | 733 (11.7)     |         |
| 20%–30%                                           | 1056 (15.4)     | 86 (14.7)       | 970 (15.5)     |         |
| >30%                                              | 3944 (57.6)     | 295 (50.4)      | 3649 (58.3)    |         |
| Age (years), mean ± SD                            | 44.2 ± 8.0      | 44.0 ± 5.1      | 44.3 ± 8.3     | 0.406   |
| Age (years), n (%)                                |                 |                 |                | <0.001  |
| 22–29                                             | 399 (5.8)       | 3 (0.5)         | 396 (6.3)      |         |

|                                               |                    |                    |                    |        |
|-----------------------------------------------|--------------------|--------------------|--------------------|--------|
| 30–39                                         | 1745 (25.5)        | 131 (22.4)         | 1614 (25.8)        |        |
| 40–49                                         | 2979 (43.5)        | 426 (72.8)         | 2553 (40.8)        |        |
| 50–60                                         | 1723 (25.2)        | 25 (4.3)           | 1698 (27.1)        |        |
| BMI (kg/m <sup>2</sup> ), n (%)               |                    |                    |                    | <0.001 |
| <25                                           | 3466 (50.6)        | 414 (70.8)         | 3052 (48.75)       |        |
| 25–30                                         | 2830 (41.3)        | 143 (24.4)         | 2687 (42.9)        |        |
| ≥30                                           | 550 (8.0)          | 28 (4.8)           | 522 (8.3)          |        |
| Smoking status, n (%)                         |                    |                    |                    | <0.001 |
| Never                                         | 2809 (41.0)        | 513 (87.7)         | 2296 (36.7)        |        |
| Ever                                          | 547 (8.0)          | 20 (3.4)           | 527 (8.4)          |        |
| Current                                       | 3490 (51.0)        | 52 (8.9)           | 3438 (54.9)        |        |
| Drinking status, n (%)                        |                    |                    |                    | <0.001 |
| Never                                         | 3926 (57.4)        | 526 (89.9)         | 3400 (54.3)        |        |
| Ever                                          | 392 (5.7)          | 23 (3.9)           | 369 (5.9)          |        |
| Current                                       | 2528 (36.9)        | 36 (6.2)           | 2492 (39.8)        |        |
| Education level, n (%)                        |                    |                    |                    | 0.656  |
| Primary or illiterate                         | 86 (1.3)           | 5 (0.9)            | 81 (1.3)           |        |
| Middle or high school                         | 5304 (77.5)        | 454 (77.6)         | 4850 (77.5)        |        |
| University or college                         | 1456 (21.3)        | 126 (21.5)         | 1330 (21.2)        |        |
| Physical activity (MET-h/week), median (IQR)  | 121.8 (84.0–150.7) | 103.8 (80.8–124.5) | 121.8 (84.0–153.3) | <0.001 |
| DASH score                                    | 21.7 ± 2.2         | 23.0 ± 2.2         | 21.5 ± 2.2         | <0.001 |
| Sedentary behavior (h), median (IQR)          | 2.6 (1.3–4.3)      | 4.0 (2.1–5.4)      | 2.5 (1.3–4.0)      | <0.001 |
| Sleep duration (h), mean ± SD                 | 6.8 ± 1.2          | 6.8 ± 1.2          | 6.8 ± 1.2          | 0.247  |
| Insomnia, n (%)                               | 2675 (39.1)        | 218 (37.3)         | 2457 (39.2)        | 0.348  |
| Diabetes, n (%)                               | 719 (10.5)         | 31 (5.3)           | 688 (11.0)         | <0.001 |
| Dyslipidemia, n (%)                           | 2781 (40.6)        | 138 (23.6)         | 2643 (42.2)        | <0.001 |
| Hypertension, n (%)                           | 1755 (25.6)        | 72 (12.3)          | 1683 (26.9)        | <0.001 |
| Liver enzyme abnormality, n (%)               | 1384 (20.2)        | 32 (5.5)           | 1352 (21.6)        | <0.001 |
| eGFR (mL/min/1.73 m <sup>2</sup> ), mean ± SD | 101.7 ± 11.4       | 102.3 ± 12.5       | 101.6 ± 11.3       | 0.207  |
| tHcy (μmol/L), mean ± SD                      | 12.2 (10.1–16.8)   | 9.2 (7.9–11.2)     | 12.5 (10.4–17.4)   | <0.001 |
| Hyperhomocysteinemia, n (%)                   | 2093 (30.6)        | 63 (10.8)          | 2030 (32.4)        | <0.001 |

103 BMI, body mass index; MET, metabolic equivalent units; IQR, interquartile range; DASH, dietary approaches to stop hypertension.  
 104 Values are expressed as the mean ± SD or median (IQR) or number (%); P-values were from Pearson's chi-square test for categorical  
 105 variables and Student's t test or Wilcoxon Scores (Rank Sums) for continuous variables. The cut-off points of the duration of night shifts  
 106 (range: 1 to 43 years), cumulative number of night shifts (range: 43 to 5239 nights), and cumulative length of night shifts (range: 344 to  
 107 53541 hours) were quarters of the corresponding continuous variables. The cut-off points of average frequency of night shifts (range: 0.1  
 108 to 10.3 nights/month), average length of night shifts (range: 8.0 to 12.0 hours/night), and percentage of hours on night shifts (range: 0.1%  
 109 to 46.2%) were chosen to secure a reasonable number of observations in each category.

110 **Table S2** Basic characteristics of participants according to duration of night shifts

| Variables                                    | Total<br>N=6846    | Duration of night shifts (years) |                     |                      |                      |                      | P value |
|----------------------------------------------|--------------------|----------------------------------|---------------------|----------------------|----------------------|----------------------|---------|
|                                              |                    | Never<br>n=1027                  | Q1 (1–12)<br>n=1454 | Q2 (13–20)<br>n=1469 | Q3 (21–28)<br>n=1439 | Q4 (29–43)<br>n=1457 |         |
| Duration of employment (years), median (IQR) | 26.4 (18.5–29.6)   | 27.4 (17.3–30.4)                 | 15.4 (9.4–27.8)     | 19.2 (15.9–23.7)     | 24.8 (23.4–27.4)     | 30.3 (29.4–34.4)     | <0.001  |
| Age (years), mean±SD                         | 44.2±8.0           | 44.±9.1                          | 39.5±9.1            | 41.2±6.9             | 45.5±5.2             | 50.6±3.8             | <0.001  |
| Sex (male), n (%)                            | 6261 (91.5)        | 909 (88.5)                       | 1336 (91.9)         | 1340 (91.2)          | 1296 (90.1)          | 1380 (94.7)          | <0.001  |
| BMI (kg/m <sup>2</sup> ), mean±SD            | 25.2±3.4           | 24.8±3.3                         | 25.3±3.6            | 25.4±3.6             | 25.2±3.3             | 25.2±3.1             | <0.001  |
| BMI (kg/m <sup>2</sup> ), n (%)              |                    |                                  |                     |                      |                      |                      | <0.001  |
| <25                                          | 3466 (50.6)        | 570 (55.5)                       | 748 (51.4)          | 702 (47.8)           | 712 (49.5)           | 734 (50.4)           |         |
| 25–30                                        | 2830 (41.3)        | 393 (38.3)                       | 565 (38.9)          | 617 (42.0)           | 624 (43.4)           | 631 (43.3)           |         |
| ≥30                                          | 550 (8.0)          | 64 (6.2)                         | 141 (9.7)           | 150 (10.2)           | 103 (7.2)            | 92 (6.3)             |         |
| Smoking status, n (%)                        |                    |                                  |                     |                      |                      |                      | <0.001  |
| Never                                        | 2809 (41.0)        | 460 (44.8)                       | 623 (42.9)          | 622 (42.3)           | 578 (40.2)           | 526 (36.1)           |         |
| Ever                                         | 547 (8.0)          | 53 (5.2)                         | 115 (7.9)           | 124 (8.4)            | 146 (10.2)           | 109 (7.5)            |         |
| Current                                      | 3490 (51.0)        | 514 (50.1)                       | 716 (49.2)          | 723 (49.2)           | 715 (49.7)           | 822 (56.4)           |         |
| Alcohol consumption, n (%)                   |                    |                                  |                     |                      |                      |                      | <0.001  |
| Never                                        | 3926 (57.4)        | 630 (61.3)                       | 908 (62.5)          | 870 (59.2)           | 789 (54.8)           | 729 (50.0)           |         |
| Ever                                         | 392 (5.7)          | 26 (2.5)                         | 87 (6.0)            | 110 (7.5)            | 115 (8.0)            | 54 (3.7)             |         |
| Current                                      | 2528 (36.9)        | 371 (36.1)                       | 459 (31.6)          | 489 (33.3)           | 535 (37.2)           | 674 (46.3)           |         |
| Education level, n (%)                       |                    |                                  |                     |                      |                      |                      | <0.001  |
| Primary or illiterate                        | 86 (1.3)           | 9 (0.9)                          | 10 (0.7)            | 5 (0.3)              | 26 (1.8)             | 36 (2.5)             |         |
| Middle or high school                        | 5304 (77.5)        | 710 (69.1)                       | 920 (63.3)          | 1073 (73.0)          | 1240 (86.2)          | 1361 (93.4)          |         |
| University or college                        | 1456 (21.3)        | 308 (30.0)                       | 524 (36.0)          | 391 (26.6)           | 173 (12.0)           | 60 (4.12)            |         |
| Physical activity (MET-h/week), median (IQR) | 121.8 (84.0–150.7) | 116.3 (84.0–152.5)               | 121.8 (84.0–152.2)  | 121.8 (84.0–142.0)   | 121.8 (84.0–150.2)   | 121.8 (84.0–155.6)   | 0.06    |

|                                               |                  |                 |                  |                  |                  |                  |        |
|-----------------------------------------------|------------------|-----------------|------------------|------------------|------------------|------------------|--------|
| DASH score, mean±SD                           | 21.7±2.2         | 21.7±2.1        | 21.6±2.2         | 21.5±2.2         | 21.8±2.2         | 21.7±2.2         | 0.592  |
| Sedentary behaviour (hours), median (IQR)     | 2.6 (1.3–4.3)    | 2.3 (1.3–3.7)   | 2.6 (1.3–4.0)    | 2.5 (1.1–4.5)    | 2.6 (1.2–4.3)    | 3.0 (1.5–4.5)    | <0.001 |
| Sleep duration (hour), mean±SD                | 6.8±1.2          | 7.1±1.3         | 6.9±1.2          | 6.9±1.1          | 6.7±1.1          | 6.6±1.2          | 0.001  |
| Insomnia, n (%)                               | 2675 (39.1)      | 353 (34.4)      | 560 (38.5)       | 592 (40.3)       | 575 (40.0)       | 595 (40.8)       | 0.011  |
| Diabetes, n (%)                               | 719 (10.5)       | 102 (9.9)       | 119 (8.2)        | 118 (8.0)        | 149 (10.4)       | 231 (15.9)       | <0.001 |
| Dyslipidemia, n (%)                           | 2781 (40.6)      | 388 (37.8)      | 558 (38.4)       | 640 (43.6)       | 586 (40.7)       | 609 (41.8)       | 0.013  |
| Hypertension, n (%)                           | 1755 (25.6)      | 255 (24.8)      | 294 (20.2)       | 319 (21.7)       | 388 (27.0)       | 499 (34.3)       | <0.001 |
| Liver enzyme abnormality, n (%)               | 1384 (20.2)      | 171 (16.7)      | 299 (20.6)       | 360 (24.5)       | 276 (19.2)       | 278 (19.1)       | <0.001 |
| eGFR (mL/min/1.73 m <sup>2</sup> ), mean ± SD | 101.7 ± 11.4     | 102.1 ± 11.3    | 104.1 ± 12.4     | 103.8 ± 10.4     | 100.8 ± 10.7     | 97.8 ± 10.9      | <0.001 |
| tHcy (µmol/L), median (IQR)                   | 12.2 (10.1–16.8) | 11.7 (9.8–15.8) | 12.1 (10.1–16.8) | 12.0 (10.0–16.1) | 12.1 (10.1–17.0) | 12.9 (10.6–17.7) | <0.001 |
| HHcy, n (%)                                   | 2093 (30.6)      | 280 (27.3)      | 441 (30.3)       | 418 (28.5)       | 442 (30.7)       | 512 (35.1)       | <0.001 |

111 BMI, body mass index; MET, metabolic equivalent units; IQR, interquartile range; DASH, dietary approaches to stop hypertension; tHcy, total homocysteine; HHcy, hyperhomocysteinemia; eGFR, estimated glomerular filtration rate.

112 Values are expressed as the mean ± SD or median (IQR) or number (%); P-values were from Pearson's chi-square test for categorical variables and analysis of variance (ANOVA) or Kruskal-Wallis test for continuous variables.

113 **Table S3** Distribution of plasma total homocysteine levels according to age group

| Variables                   | Age group (years) |                 |                 |                  | P value |
|-----------------------------|-------------------|-----------------|-----------------|------------------|---------|
|                             | 22–29             | 30–39           | 40–49           | 50–60            |         |
| HHcy, n (%)                 |                   |                 |                 |                  | 0.001   |
| No                          | 269 (67.4)        | 1242 (71.2)     | 2111 (70.9)     | 1131 (65.6)      |         |
| Yes                         | 130 (32.6)        | 503 (28.8)      | 868 (29.1)      | 592 (34.4)       |         |
| tHcy (µmol/L), median (IQR) | 12.1 (10.2–17.3)  | 11.8 (9.9–16.7) | 12.0 (9.9–16.4) | 12.9 (10.6–17.3) | <0.001  |

114 tHcy, total homocysteine; HHcy, hyperhomocysteinemia.

115



116 **Table S4** Independent effects of different exposure metrics of night shift work on HHcy among  
 117 night shift workers (ever or current)

| Exposure metrics                         | OR (95% CI)          |                      |                      |
|------------------------------------------|----------------------|----------------------|----------------------|
|                                          | Model 1 <sup>a</sup> | Model 2 <sup>b</sup> | Model 3 <sup>c</sup> |
| <b>Current shift status</b>              |                      |                      |                      |
| Ever                                     | 1.00                 | 1.00                 | 1.00                 |
| Current                                  | 1.08 (0.92–1.26)     | 1.08 (0.92–1.27)     | 1.07 (0.92–1.27)     |
| <b>Duration of night shifts</b>          |                      |                      |                      |
| ≤20 years                                | 1.00                 | 1.00                 | 1.00                 |
| >20 years                                | 1.14 (1.01–1.29)     | 1.10 (0.94–1.28)     | 1.07 (0.91–1.25)     |
| <b>Average frequency of night shifts</b> |                      |                      |                      |
| ≤7 nights/month                          | 1.00                 | 1.00                 | 1.00                 |
| >7 nights/month                          | 1.06 (0.92–1.23)     | 1.07 (0.92–1.24)     | 1.07 (0.91–1.24)     |
| <b>Average length of night shifts</b>    |                      |                      |                      |
| ≤8 hours/night                           | 1.00                 | 1.00                 | 1.00                 |
| >8 hours/night                           | 1.11 (0.97–1.27)     | 1.08 (0.94–1.24)     | 1.08 (0.94–1.24)     |

118 OR, odds ratio; CI, confidence intervals.

119 <sup>a</sup> Model 1, adjusted for current shift status, duration of night shifts, average frequency of night shifts, and average length of night shifts.

120 <sup>b</sup> Model 2, adjusted for current shift status, duration of night shifts, average frequency of night shifts, average length of night shifts, age,  
 121 and sex.

122 <sup>c</sup> Model 3, adjusted for current shift status, duration of night shifts, average frequency of night shifts, average length of night shifts, age,  
 123 sex, BMI, smoking status, dyslipidaemia, hypertension, and decreased eGFR.

124 **Table S5** Interaction between duration and average frequency of night shifts on odds of HHcy

|                                                                          | All               | Male              | Female             |
|--------------------------------------------------------------------------|-------------------|-------------------|--------------------|
| <b>Main effects, OR (95% CI)</b>                                         |                   |                   |                    |
| Duration of night shifts (>20 years vs ≤20 years)                        | 1.01 (0.83–1.23)  | 1.03 (0.84–1.26)  | 1.77 (0.45–6.91)   |
| Average frequency of night shifts (>7nights/month vs ≤7<br>nights/month) | 1.00 (0.83–1.22)  | 0.99 (0.81–1.20)  | 1.71 (0.64–4.59)   |
| <b>Joint effect, OR (95% CI)</b>                                         |                   |                   |                    |
| Multiplicative interaction, OR (95% CI)                                  | 1.18 (0.90–1.55)  | 1.19 (0.90–1.56)  | 1.08 (0.21–5.58)   |
| <b>Additive interaction <sup>a</sup></b>                                 |                   |                   |                    |
| Relative excess risk due to interaction, RERI (95% CI)                   | 0.18 (-0.09–0.46) | 0.19 (-0.09–0.47) | -1.36 (-4.27–1.56) |
| Attributable proportion due to interaction, AP (95% CI)                  | 0.15 (-0.08–0.38) | 0.16 (-0.07–0.39) | -1.21 (-3.91–1.49) |

125 **OR**, odds ratio; **CI**, confidence intervals; **RERI**, relative excess risk due to interaction; **AP**, attributable proportion due to interaction;

126 <sup>a</sup> If there is no biological interaction, RERI and AP are equal to 0.

127 Adjusted for age, sex, BMI, smoking status, dyslipidaemia, hypertension, and decreased eGFR.

128

129 **Table S6** Multivariate-adjusted ORs between HHcy and different exposure metrics of night shift work according to sex

| Exposure metrics                                  | Male        |              |                  | Female      |              |                  |
|---------------------------------------------------|-------------|--------------|------------------|-------------|--------------|------------------|
|                                                   | HHcy        |              | OR (95% CI)      | HHcy        |              | OR (95% CI)      |
|                                                   | No, [n (%)] | Yes, [n (%)] |                  | No, [n (%)] | Yes, [n (%)] |                  |
| <b>Current shift status, n (%)</b>                |             |              |                  |             |              |                  |
| Never                                             | 641 (15.2)  | 268 (13.2)   | 1.00             | 106 (20.3)  | 12 (19.1)    | 1.00             |
| Ever                                              | 938 (22.2)  | 415 (20.4)   | 1.08 (0.89–1.29) | 124 (23.8)  | 16 (25.4)    | 1.05 (0.46–2.39) |
| Current                                           | 2652 (62.7) | 1347 (66.4)  | 1.24 (1.06–1.46) | 292 (55.9)  | 35 (55.6)    | 0.94 (0.46–1.92) |
| <b>Duration of night shifts (years)</b>           |             |              |                  |             |              |                  |
| Never                                             | 641 (15.2)  | 268 (13.2)   | 1.00             | 106 (20.3)  | 12 (19.1)    | 1.00             |
| Q1 (1–12)                                         | 918 (21.7)  | 427 (21.0)   | 1.14 (0.94–1.38) | 104 (19.9)  | 18 (28.6)    | 1.29 (0.57–2.91) |
| Q2 (13–20)                                        | 954 (22.6)  | 407 (20.1)   | 1.07 (0.88–1.30) | 118 (22.6)  | 12 (19.1)    | 0.78 (0.32–1.86) |
| Q3 (21–27)                                        | 792 (18.7)  | 387 (19.1)   | 1.20 (0.99–1.46) | 118 (22.6)  | 11 (17.5)    | 0.84 (0.35–2.04) |
| Q4 (28–43)                                        | 926 (21.9)  | 541 (26.7)   | 1.36 (1.13–1.64) | 76 (14.6)   | 10 (15.9)    | 1.04 (0.41–2.65) |
| <i>P</i> trend                                    |             |              | 0.002            |             |              | 0.629            |
| <b>Cumulative number of night shifts (nights)</b> |             |              |                  |             |              |                  |
| Never                                             | 641 (15.2)  | 268 (13.2)   | 1.00             | 106 (20.3)  | 12 (19.1)    | 1.00             |
| Q1 (43–1131)                                      | 911 (21.5)  | 427 (21.0)   | 1.15 (0.95–1.39) | 101 (19.4)  | 16 (25.4)    | 1.22 (0.53–2.80) |
| Q2 (1132–1848)                                    | 932 (22.0)  | 392 (19.3)   | 1.05 (0.87–1.28) | 118 (22.6)  | 13 (20.6)    | 0.79 (0.34–1.88) |
| Q3 (1854–2584)                                    | 879 (20.8)  | 438 (21.6)   | 1.23 (1.02–1.48) | 127 (24.3)  | 12 (19.1)    | 0.86 (0.36–2.05) |
| Q4 (2585–5239)                                    | 868 (20.5)  | 505 (24.9)   | 1.35 (1.12–1.63) | 70 (13.4)   | 10 (15.9)    | 1.14 (0.45–2.91) |
| <i>P</i> trend                                    |             |              | 0.003            |             |              | 0.799            |
| <b>Cumulative length of night shifts (hours)</b>  |             |              |                  |             |              |                  |
| Never                                             | 641 (15.2)  | 268 (13.2)   | 1.00             | 106 (20.3)  | 12 (19.1)    | 1.00             |

|                                     |             |             |                  |            |           |                  |
|-------------------------------------|-------------|-------------|------------------|------------|-----------|------------------|
| Q1 (344–9488)                       | 904 (21.4)  | 430 (21.2)  | 1.16 (0.96–1.40) | 102 (19.5) | 16 (25.4) | 1.20 (0.52–2.74) |
| Q2 (9490–15259)                     | 937 (22.2)  | 390 (19.2)  | 1.04 (0.86–1.27) | 117 (22.4) | 14 (22.2) | 0.91 (0.39–2.13) |
| Q3 (15265–21293)                    | 881 (20.8)  | 441 (21.7)  | 1.24 (1.02–1.50) | 126 (24.1) | 8 (12.7)  | 0.57 (0.22–1.48) |
| Q4 (21295–53541)                    | 868 (20.5)  | 501 (24.7)  | 1.33 (1.11–1.61) | 71 (13.6)  | 13 (20.6) | 1.43 (0.59–3.46) |
| <i>P</i> trend                      |             |             | 0.005            |            |           | 0.942            |
| Average frequency of night shifts   |             |             |                  |            |           |                  |
| Never                               | 641 (15.2)  | 268 (13.2)  | 1.00             | 106 (20.3) | 12 (19.1) | 1.00             |
| <3 nights/month                     | 976 (23.1)  | 448 (2.1)   | 1.11 (0.93–1.34) | 134 (25.7) | 18 (28.6) | 1.04 (0.46–2.32) |
| 3–7 nights/month                    | 562 (13.3)  | 261 (12.9)  | 1.14 (0.93–1.40) | 74 (14.2)  | 4 (6.4)   | 0.40 (0.12–1.34) |
| >7 nights/month                     | 2052 (48.5) | 1053 (51.9) | 1.26 (1.07–1.48) | 208 (39.9) | 29 (46.0) | 1.11 (0.54–2.30) |
| <i>P</i> trend                      |             |             | 0.003            |            |           | 0.861            |
| Average length of night shifts      |             |             |                  |            |           |                  |
| Never                               | 641 (15.2)  | 268 (13.2)  | 1.00             | 106 (20.3) | 12 (19.1) | 1.00             |
| ≤8 hours/night                      | 2754 (65.1) | 1323 (65.2) | 1.18 (1.01–1.39) | 328 (62.8) | 37 (58.7) | 0.89 (0.44–1.79) |
| 8–9 hours/night                     | 497 (11.8)  | 256 (12.6)  | 1.27 (1.03–1.57) | 54 (10.3)  | 3 (4.8)   | 0.43 (0.11–1.77) |
| >9 hours/night                      | 339 (8.0)   | 183 (9.0)   | 1.22 (0.96–1.54) | 34 (6.5)   | 11 (17.5) | 2.48 (0.96–6.43) |
| <i>P</i> trend                      |             |             | 0.058            |            |           | 0.149            |
| Percentage of hours on night shifts |             |             |                  |            |           |                  |
| Never                               | 641 (15.2)  | 268 (13.2)  | 1.00             | 106 (20.3) | 12 (19.1) | 1.00             |
| <20%                                | 499 (11.8)  | 234 (11.5)  | 1.14 (0.92–1.41) | 74 (14.2)  | 12 (19.1) | 1.21 (0.50–2.94) |
| 20%–30%                             | 670 (15.8)  | 300 (14.8)  | 1.09 (0.89–1.34) | 77 (14.8)  | 9 (14.3)  | 0.88 (0.33–2.34) |
| >30%                                | 2421 (57.2) | 1228 (60.5) | 1.24 (1.06–1.46) | 265 (50.8) | 30 (47.6) | 0.93 (0.45–1.91) |
| <i>P</i> trend                      |             |             | 0.008            |            |           | 0.677            |

130 HHcy, hyperhomocysteinemia; OR, odds ratio; CI, confidence intervals.

131 Adjusted for age, sex, BMI, smoking status, dyslipidaemia, hypertension, and decreased eGFR.

**Table S7** Multivariate-adjusted ORs between HHcy and different exposure metrics of night shift work after further adjustment for the main occupational hazards

| Exposure metrics                                        | OR (95% CI)      |                  |                  |
|---------------------------------------------------------|------------------|------------------|------------------|
|                                                         | All              | Male             | Female           |
| <b>Current shift status</b>                             |                  |                  |                  |
| Never                                                   | 1.00             | 1.00             | 1.00             |
| Ever                                                    | 1.08 (0.90–1.30) | 1.08 (0.90–1.30) | 0.99 (0.43–2.27) |
| Current                                                 | 1.25 (1.07–1.47) | 1.27 (1.08–1.49) | 0.89 (0.43–1.85) |
| <b>Duration of night shifts (years)</b>                 |                  |                  |                  |
| Never                                                   | 1.00             | 1.00             | 1.00             |
| Q1 (1–12)                                               | 1.16 (0.96–1.39) | 1.15 (0.95–1.39) | 1.20 (0.52–2.73) |
| Q2 (13–20)                                              | 1.06 (0.88–1.29) | 1.08 (0.89–1.32) | 0.73 (0.30–1.78) |
| Q3 (21–27)                                              | 1.20 (0.99–1.45) | 1.22 (1.00–1.49) | 0.82 (0.33–2.04) |
| Q4 (28–43)                                              | 1.36 (1.13–1.64) | 1.38 (1.14–1.66) | 0.97 (0.38–2.49) |
| <i>P</i> trend                                          | 0.003            | 0.001            | 0.576            |
| <b>Cumulative number of night shifts (nights)</b>       |                  |                  |                  |
| Never                                                   | 1.00             | 1.00             | 1.00             |
| Q1 (43–1131)                                            | 1.16 (0.97–1.40) | 1.16 (0.96–1.40) | 1.13 (0.49–2.63) |
| Q2 (1132–1848)                                          | 1.06 (0.87–1.28) | 1.07 (0.88–1.30) | 0.75 (0.31–1.81) |
| Q3 (1854–2584)                                          | 1.22 (1.01–1.47) | 1.24 (1.03–1.51) | 0.85 (0.35–2.05) |
| Q4 (2585–5239)                                          | 1.35 (1.12–1.63) | 1.36 (1.13–1.65) | 1.05 (0.41–2.71) |
| <i>P</i> trend                                          | 0.003            | 0.002            | 0.737            |
| <b>Cumulative length of night shifts (hours)</b>        |                  |                  |                  |
| Never                                                   | 1.00             | 1.00             | 1.00             |
| Q1 (344–9488)                                           | 1.17 (0.97–1.41) | 1.17 (0.97–1.41) | 1.12 (0.48–2.59) |
| Q2 (9490–15259)                                         | 1.05 (0.87–1.27) | 1.06 (0.87–1.29) | 0.86 (0.36–2.03) |
| Q3 (15265–21293)                                        | 1.21 (1.01–1.47) | 1.25 (1.03–1.52) | 0.54 (0.20–1.43) |
| Q4 (21295–53541)                                        | 1.35 (1.12–1.63) | 1.35 (1.11–1.64) | 1.32 (0.54–3.22) |
| <i>P</i> trend                                          | 0.005            | 0.004            | 0.854            |
| <b>Average frequency of night shifts (nights/month)</b> |                  |                  |                  |
| Never                                                   | 1.00             | 1.00             | 1.00             |
| <3                                                      | 1.12 (0.94–1.34) | 1.12 (0.93–1.35) | 0.95 (0.42–2.16) |
| 3–7                                                     | 1.12 (0.91–1.38) | 1.16 (0.94–1.43) | 0.37 (0.11–1.28) |
| >7                                                      | 1.27 (1.08–1.50) | 1.28 (1.08–1.51) | 1.07 (0.50–2.45) |
| <i>P</i> trend                                          | 0.002            | 0.002            | 0.880            |
| <b>Average length of night shifts (hours/night)</b>     |                  |                  |                  |
| Never                                                   | 1.00             | 1.00             | 1.00             |
| ≤8                                                      | 1.18 (1.01–1.38) | 1.19 (1.02–1.41) | 0.82 (0.40–1.68) |
| 8–9                                                     | 1.25 (1.01–1.54) | 1.28 (1.04–1.59) | 0.38 (0.90–1.63) |
| >9                                                      | 1.28 (1.02–1.61) | 1.23 (0.97–1.56) | 2.37 (0.91–6.21) |
| <i>P</i> trend                                          | 0.028            | 0.052            | 0.169            |
| <b>Percentage of hours on night shifts, n (%)</b>       |                  |                  |                  |

|                |                  |                  |                  |
|----------------|------------------|------------------|------------------|
| Never          | 1.00             | 1.00             | 1.00             |
| <20%           | 1.16 (0.94–1.43) | 1.15 (0.93–1.43) | 1.12 (0.45–2.78) |
| 20%–30%        | 1.10 (0.90–1.34) | 1.11 (0.90–1.35) | 0.82 (0.31–2.20) |
| >30%           | 1.24 (1.06–1.46) | 1.26 (1.07–1.49) | 0.89 (0.43–1.86) |
| <i>P</i> trend | 0.010            | 0.006            | 0.628            |

OR, odds ratio; CI, confidence intervals.

Adjusted for age, sex (except for gender stratification), BMI, smoking status, dyslipidaemia, hypertension, decreased eGFR, dust exposure (No or Yes), heat stress exposure (No or Yes), noise exposure (No or Yes), and carbon monoxide exposure (No or Yes)

| Exposure metrics                                        | Model 1          |  |  | Model 2          |  |  | Model 3          |  |  |
|---------------------------------------------------------|------------------|--|--|------------------|--|--|------------------|--|--|
|                                                         | OR (95% CI)      |  |  | OR (95% CI)      |  |  | OR (95% CI)      |  |  |
| <b>Current shift status</b>                             |                  |  |  |                  |  |  |                  |  |  |
| Never                                                   | 1.00             |  |  | 1.00             |  |  | 1.00             |  |  |
| Ever                                                    | 1.08 (0.91–1.29) |  |  | 1.07 (0.89–1.28) |  |  | 1.08 (0.90–1.29) |  |  |
| Current                                                 | 1.25 (1.08–1.46) |  |  | 1.23 (1.05–1.44) |  |  | 1.23 (1.06–1.44) |  |  |
| <b>Duration of night shifts (years)</b>                 |                  |  |  |                  |  |  |                  |  |  |
| Never                                                   | 1.00             |  |  | 1.00             |  |  | 1.00             |  |  |
| Q1 (1–12)                                               | 1.16 (0.97–1.39) |  |  | 1.13 (0.95–1.36) |  |  | 1.15 (0.96–1.38) |  |  |
| Q2 (13–20)                                              | 1.04 (0.87–1.25) |  |  | 1.04 (0.86–1.25) |  |  | 1.05 (0.87–1.27) |  |  |
| Q3 (21–27)                                              | 1.17 (0.97–1.40) |  |  | 1.17 (0.97–1.41) |  |  | 1.19 (0.98–1.43) |  |  |
| Q4 (28–43)                                              | 1.47 (1.24–1.74) |  |  | 1.38 (1.15–1.65) |  |  | 1.35 (1.12–1.61) |  |  |
| <i>P</i> trend                                          | <0.001           |  |  | 0.001            |  |  | 0.003            |  |  |
| <b>Cumulative number of night shifts (nights)</b>       |                  |  |  |                  |  |  |                  |  |  |
| Never                                                   | 1.00             |  |  | 1.00             |  |  | 1.00             |  |  |
| Q1 (43–1131)                                            | 1.17 (0.98–1.39) |  |  | 1.14 (0.95–1.36) |  |  | 1.15 (0.96–1.38) |  |  |
| Q2 (1132–1848)                                          | 1.03 (0.86–1.23) |  |  | 1.03 (0.85–1.24) |  |  | 1.04 (0.86–1.26) |  |  |
| Q3 (1854–2584)                                          | 1.19 (1.00–1.42) |  |  | 1.20 (1.00–1.44) |  |  | 1.21 (1.01–1.45) |  |  |
| Q4 (2585–5239)                                          | 1.47 (1.23–1.74) |  |  | 1.37 (1.14–1.65) |  |  | 1.34 (1.11–1.61) |  |  |
| <i>P</i> trend                                          | <0.001           |  |  | 0.001            |  |  | 0.004            |  |  |
| <b>Cumulative length of night shifts (hours)</b>        |                  |  |  |                  |  |  |                  |  |  |
| Never                                                   | 1.00             |  |  | 1.00             |  |  | 1.00             |  |  |
| Q1 (344–9488)                                           | 1.18 (0.99–1.41) |  |  | 1.15 (0.96–1.39) |  |  | 1.16 (0.97–1.40) |  |  |
| Q2 (9490–15259)                                         | 1.02 (0.86–1.22) |  |  | 1.02 (0.84–1.23) |  |  | 1.04 (0.86–1.25) |  |  |
| Q3 (15265–21293)                                        | 1.19 (1.00–1.42) |  |  | 1.18 (0.99–1.42) |  |  | 1.20 (1.00–1.45) |  |  |
| Q4 (21295–53541)                                        | 1.46 (1.23–1.74) |  |  | 1.37 (1.14–1.65) |  |  | 1.33 (1.11–1.61) |  |  |
| <i>P</i> trend                                          | <0.001           |  |  | 0.003            |  |  | 0.006            |  |  |
| <b>Average frequency of night shifts (nights/month)</b> |                  |  |  |                  |  |  |                  |  |  |
| Never                                                   | 1.00             |  |  | 1.00             |  |  | 1.00             |  |  |
| <3                                                      | 1.12 (0.94–1.33) |  |  | 1.11 (0.93–1.32) |  |  | 1.11 (0.93–1.33) |  |  |
| 3–7                                                     | 1.11 (0.91–1.36) |  |  | 1.09 (0.89–1.34) |  |  | 1.10 (0.91–1.35) |  |  |
| >7                                                      | 1.28 (1.09–1.49) |  |  | 1.25 (1.07–1.47) |  |  | 1.25 (1.07–1.47) |  |  |
| <i>P</i> trend                                          | 0.001            |  |  | 0.003            |  |  | 0.004            |  |  |
| <b>Average length of night shifts (hours/night)</b>     |                  |  |  |                  |  |  |                  |  |  |
| Never                                                   | 1.00             |  |  | 1.00             |  |  | 1.00             |  |  |
| ≤8                                                      | 1.18 (1.01–1.37) |  |  | 1.16 (1.00–1.36) |  |  | 1.17 (1.01–1.37) |  |  |
| 8–9                                                     | 1.25 (1.03–1.53) |  |  | 1.21 (0.99–1.48) |  |  | 1.23 (1.00–1.52) |  |  |
| >9                                                      | 1.39 (1.11–1.73) |  |  | 1.30 (1.04–1.63) |  |  | 1.27 (1.01–1.60) |  |  |
| <i>P</i> trend                                          | 0.003            |  |  | 0.022            |  |  | 0.031            |  |  |
| <b>Percentage of hours on night shifts</b>              |                  |  |  |                  |  |  |                  |  |  |
| Never                                                   | 1.00             |  |  | 1.00             |  |  | 1.00             |  |  |
| <20%                                                    | 1.15 (0.94–1.40) |  |  | 1.14 (0.93–1.40) |  |  | 1.15 (0.94–1.42) |  |  |
| 20%–30%                                                 | 1.10 (0.91–1.34) |  |  | 1.08 (0.89–1.31) |  |  | 1.09 (0.90–1.32) |  |  |
| >30%                                                    | 1.25 (1.07–1.46) |  |  | 1.23 (1.05–1.44) |  |  | 1.23 (1.05–1.43) |  |  |
| <i>P</i> trend                                          | 0.004            |  |  | 0.009            |  |  | 0.010            |  |  |

**Figure S1 Associations of different exposure metrics of night shift work with HHcy odds.** HHcy, hyperhomocysteinemia; OR, odds ratio; CI, confidence intervals. Model 1: unadjusted; Model 2: adjusted for age and sex; Model 3: adjusted for age, sex, BMI, smoking status, dyslipidaemia, hypertension, and decreased eGFR.

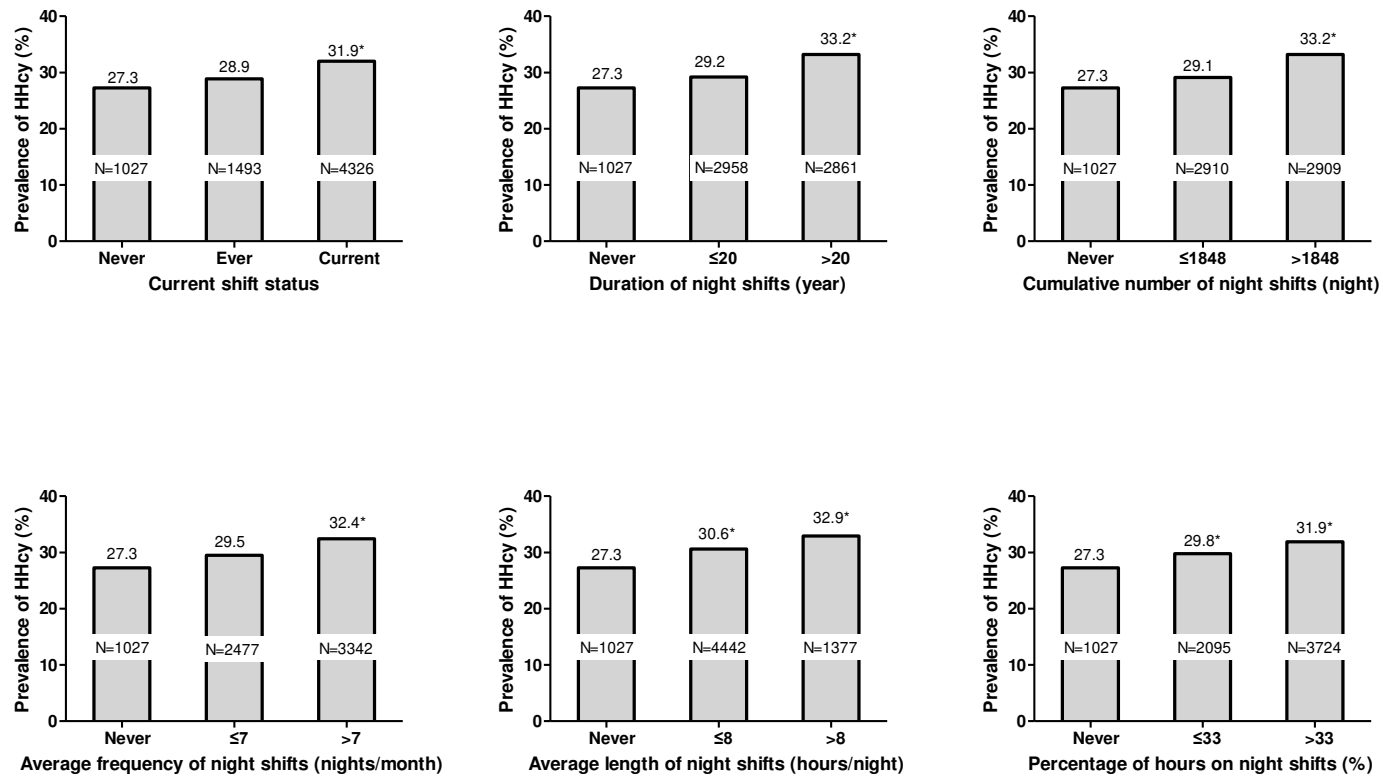

**Figure S2 Prevalence of HHcy according to different exposure metrics of night shift work.** The number in the middle of each column indicates the number of subjects included in the category. \* $P < 0.05$  (vs. the “Never” group).

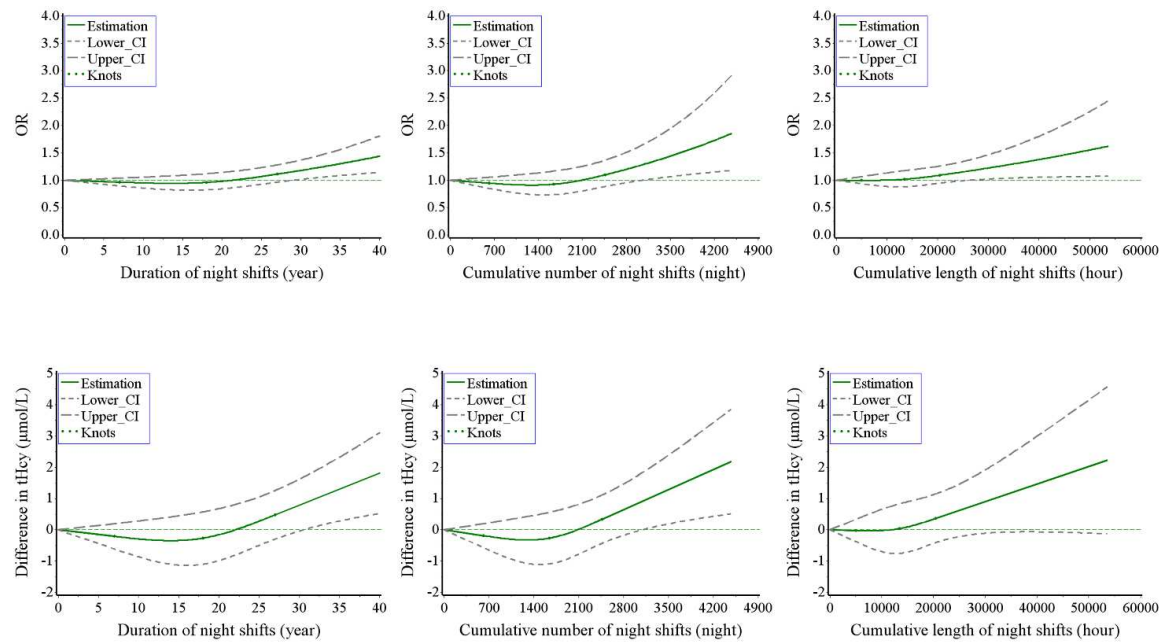

**Figure S3 Associations of duration, cumulative number and cumulative length of night shifts with tHcy (as a continuous or a binary variable) from restricted cubic spline models after deleting the last 1% quantile of the duration of night shifts, cumulative number of night shifts and cumulative length of night shifts.** “Difference in tHcy” indicates difference of tHcy ( $\mu\text{mol/L}$ ) levels in the serum where the reference values for duration, cumulative number and cumulative length of night shifts are all 0 (never worked night shifts); Adjusted for age, sex, BMI, smoking status, dyslipidaemia, hypertension, and decreased eGFR. OR, odds ratio; CI, confidence interval; tHcy, total homocysteine; HHcy, hyperhomocysteinemia.

## References

- 1 Maskarinec G, Lim U, Jacobs S, et al. Diet Quality in Midadulthood Predicts Visceral Adiposity and Liver Fatness in Older Ages: The Multiethnic Cohort Study. *Obesity (Silver Spring, Md.)* 2017;25:1442-50.
- 2 Celis-Morales CA, Perez-Bravo F, Ibanez L, et al. Objective vs. self-reported physical activity and sedentary time: effects of measurement method on relationships with risk biomarkers. *PLoS One* 2012;7:e36345.
- 3 Soldatos CR, Dikeos DG, Paparrigopoulos TJ. Athens Insomnia Scale: validation of an instrument based on ICD-10 criteria. *J. Psychosom. Res.* 2000;48:555-60.
- 4 Stamatakis E, Davis M, Stathi A, et al. Associations between multiple indicators of objectively-measured and self-reported sedentary behaviour and cardiometabolic risk in older adults. *Prev. Med.* 2012;54:82-7.
- 5 2016 Chinese guidelines for the management of dyslipidemia in adults. *J Geriatr Cardiol* 2018;15:1-29.
- 6 Levey AS, Stevens LA, Schmid CH, et al. A new equation to estimate glomerular filtration rate. *Ann. Intern. Med.* 2009;150:604-12.
- 7 Webster AC, Nagler EV, Morton RL, et al. Chronic Kidney Disease. *Lancet (London, England)* 2017;389:1238-52.
- 8 GBZ/T GBZ/T 229.1–2010 Classification of occupational hazards at workplaces. Part 1: Occupational exposure to industrial dust.  
[http://niohp.chinacdc.cn/zyysjk/zywsbzml/201210/t20121012\\_70490.htm](http://niohp.chinacdc.cn/zyysjk/zywsbzml/201210/t20121012_70490.htm)
- 9 GBZ/T 192.1–2007 Determination of dust in the air of workplace. Part 1: Total dust concentration. [http://niohp.chinacdc.cn/zyysjk/zywsbzml/201210/t20121012\\_70522.htm](http://niohp.chinacdc.cn/zyysjk/zywsbzml/201210/t20121012_70522.htm)
- 10 GBZ 2.2–2007 Occupational exposure limits for hazardous agents in the workplace. Part 2: Physical agents. [http://niohp.chinacdc.cn/zyysjk/zywsbzml/201303/t20130329\\_79199.htm](http://niohp.chinacdc.cn/zyysjk/zywsbzml/201303/t20130329_79199.htm)
- 11 GBZ/T 189.7–2007 Measurement of physical agents in workplace. Part 7: Heat Stress.  
[http://niohp.chinacdc.cn/zyysjk/zywsbzml/201210/t20121012\\_70527.htm](http://niohp.chinacdc.cn/zyysjk/zywsbzml/201210/t20121012_70527.htm)
- 12 GBZ/T 229.2–2010 Classification of occupational hazards at workplaces. Part 2: Occupational exposure to chemicals.  
[http://niohp.chinacdc.cn/zyysjk/zywsbzml/201210/t20121012\\_70489.htm](http://niohp.chinacdc.cn/zyysjk/zywsbzml/201210/t20121012_70489.htm)
13. GBZ/T 160.28–2004 Methods for determination of inorganic carbon compounds in the air of workplace. [http://niohp.chinacdc.cn/zyysjk/zywsbzml/201210/t20121015\\_70624.htm](http://niohp.chinacdc.cn/zyysjk/zywsbzml/201210/t20121015_70624.htm)
14. GBZ/T 229.4–2012 Classification of occupational hazards at workplaces. Part 4: Occupational exposure to noise.  
[http://niohp.chinacdc.cn/zyysjk/zywsbzml/201307/t20130715\\_84934.htm](http://niohp.chinacdc.cn/zyysjk/zywsbzml/201307/t20130715_84934.htm)
15. GBZ/T 189.8–2007 Measurement of physical agents in workplace. Part 8: Noise.  
[http://niohp.chinacdc.cn/zyysjk/zywsbzml/201210/t20121012\\_70526.htm](http://niohp.chinacdc.cn/zyysjk/zywsbzml/201210/t20121012_70526.htm)
